1 **Factors associated with peri-neonatal mortality**  
2 **in Sao Tome & Principe: a prospective cohort study**

3  
4  
5 Alexandra Vasconcelos (A Vasconcelos)<sup>1\*</sup>, Swasilanne Sousa (S Sousa)<sup>2</sup>, Nelson Bandeira  
6 (N Bandeira)<sup>2</sup>, Marta Alves (M Alves)<sup>3</sup>, Ana Luísa Papoila (AL Papoila)<sup>3</sup>, Filomena Pereira  
7 (F Pereira)<sup>1</sup>, Maria Céu Machado (MC Machado)<sup>4</sup>

8  
9 \* Correspondence: [alexandravasc@gmail.com](mailto:alexandravasc@gmail.com) (AV)  
10 [ORCID: 0000-0001-8042-0846](https://orcid.org/0000-0001-8042-0846)

11  
12 **Author affiliations**

13 1. Unidade de Clínica Tropical - Global Health and Tropical Medicine (GHTM), Instituto de  
14 Higiene e Medicina Tropical (IHMT), Universidade NOVA de Lisboa. Lisboa - Portugal

15 2. Maternidade, Hospital Dr. Ayres de Menezes, São Tomé, República Democrática de São  
16 Tomé e Príncipe

17 3. CEAUL, NOVA Medical School/Faculdade de Ciências Médicas, Universidade NOVA de  
18 Lisboa, Lisboa - Portugal

19 4. Professora Catedrática Jubilada da Faculdade de Medicina de Lisboa, Universidade de  
20 Lisboa. Lisboa – Portugal

21  
22  
23  
24  
25  
26  
27  
28  
29  
30  
31  
32

## 33 **Abstract**

---

### 34 Background

35 Neonatal mortality reduction is a global goal but its factors in high-burden nations vary and  
36 are poorly understood. This study was conducted to identify the factors affecting peri-  
37 neonatal mortality in Sao Tome & Principe (STP), one of the smallest African countries.

38

### 39 Methods

40 Institution-based prospective cohort study conducted at Hospital Dr. Ayres Menezes.  
41 Maternal-neonate dyads enrolled were followed up after the 28<sup>th</sup> day of life (n=194) for  
42 identification of neonatal death-outcome (n=22) and alive-outcome groups (n=172). Data  
43 were collected from pregnancy cards, hospital records and face-to-face interviews. After the  
44 28<sup>th</sup> day of birth, a phone call was made to evaluate the newborn's health status. A logistic  
45 regression model was used to identify the relevant factors associated with mortality, a p value  
46 <0.05 was considered statistically significant.

47

### 48 Results

49 The mean gestational age of the death-outcome and alive-outcome groups was 36 (SD=4.8)  
50 and 39 (SD=1.4) weeks, respectively. Death-outcome group (n=22) included sixteen  
51 stillbirths, four early and two late neonatal deaths. High-risk pregnancy score [cOR 2.91,  
52 95%CI:1.18-7.22], meconium-stained fluid [cOR 4.38, 95%CI:1.74–10.98], prolonged  
53 rupture of membranes [cOR 4.84, 95%CI:1.47–15.93], transfer from another unit [cOR 6.08,  
54 95%CI:1.95–18.90], and instrumental vaginal delivery [cOR 8.90, 95%CI:1.68–47.21], were  
55 factors significantly associated with mortality. The odds of experiencing death were higher  
56 for newborns with infectious risk, IUGR, resuscitation maneuvers, fetal distress at birth, birth  
57 asphyxia, and unit care admission. Female newborn [cOR 0.37, 95%CI:0.14-1.00] and birth

58 weight of more than 2500 g [cOR 0.017, 95%CI:0.002-0.162] were found to be protective  
59 factors. In the multivariable model, meconium-stained fluid was significantly associated with  
60 death outcome.

#### 61 Conclusion

62 Factors such as having a high-risk pregnancy score, meconium-stained amniotic fluid,  
63 prolonged rupture of membranes, being transferred from another unit, and an instrumental-  
64 assisted vaginal delivery increased 4- to 9-fold the risk of stillbirth and neonatal death. Of  
65 the factors associated with peri-neonatal mortality in this study, avoiding health-worker-  
66 related factors associated with delays in prompt intrapartum care is a key strategy to  
67 implement in Sao Tome & Principe.

68 Keywords: neonatal mortality, perinatal mortality, stillbirth, neonatal death, Sao Tome &  
69 Principe

70

## 71 **Introduction**

---

72

73 The first 28 days of life—the neonatal period—are the most vulnerable time for a child’s  
74 survival, and a significant number die before birth never having the chance to take their first  
75 breath. Perinatal mortality includes stillbirths and early neonatal deaths (ENND), indicating  
76 the death of a live newborn before the age of seven completed days [1]. Late neonatal deaths  
77 (LNNDs) are those that occur after 7 days to 28 completed days of birth [2].

78 Globally, perinatal mortality accounts for three-fourths of deaths during the neonatal period  
79 [3,4]. More than half of the cases of stillbirths occur when pregnant women are in labor, and  
80 these deaths are directly related to the lack of skilled care at this critical time [5,6]. On the  
81 other hand, the largest contributors to neonatal mortality (ENND plus LNND) are  
82 complications of preterm birth, birth asphyxia, infection, and congenital malformations  
83 although they can differ depending on the country context [7].

84 Only in the last two decades, mainly after Lawn et al published article titled “4 million  
85 neonatal deaths: When? Where? Why?” [8], attention started to be given to the neonatal  
86 period in developing countries although stillbirths are still invisible and missing from the  
87 Sustainable Development Goals (SDG) agenda [5,9,10]. It urges to highlight that stillbirths  
88 and newborn deaths account for twice as many deaths as malaria and human  
89 immunodeficiency virus (HIV) infection combined but have received much less awareness  
90 and funding in these resource-constrained countries [8,9].

91 Understanding the causes of stillbirths (fetal deaths) is also complex, as there are many  
92 promoting and interacting factors [11]. In most low –to medium - income countries (LMICs),  
93 it is difficult to determine the exact reason for the stillbirth; therefore, the cause of death is  
94 often classified as “unexplained” [5]. Researchers report that different risk factors for fetal  
95 death, such as maternal factors (advanced maternal age, high pre-pregnancy body mass index,

96 smoking, low socioeconomic status), obstetric history (grand multiparity, previous stillbirth),  
97 antepartum factors (fewer than four antenatal visits, fetal growth restriction, maternal anemia,  
98 maternal fever and infections, antepartum hemorrhage, hypertension), and intrapartum factors  
99 (preterm birth, extremes of neonatal birth weight, cesarean delivery, operative vaginal  
100 delivery, and assisted breech delivery), are all factors that have been reported in various  
101 studies as causes of stillbirths [6,11-15].

102 Sao Tome & Principe (STP) is an LMIC with low HIV/AIDS prevalence and a malaria  
103 preelimination phase [16,17]. There is an established antenatal care (ANC) service, with a  
104 98% rate of women seen at least once by a skilled health provider during pregnancy and a  
105 95.4% rate of deliveries occurring in health units [17]. In STP, peri-neonatal mortality is  
106 considered a public health problem in the country, given that neonatal deaths accounts for  
107 approximately 43% of all under5 deaths [18]. At the time this study was initiated, there was  
108 an annual rate of 22 stillbirths and 22 newborn deaths per 1000 livebirths [18].

109 We are aware that the concept of knowing what works in terms of reducing perinatal and  
110 neonatal mortality is complicated by a huge diversity of country contexts and of determinants  
111 of maternal and neonatal health [19-22]. However, according to Lawn and other authors,  
112 identifying and addressing avoidable causes of neonatal death is possible even in poorly  
113 functioning health systems, justifying our current study [8,9]. Answering - why, when, and  
114 where - newborns die in Sao Tome & Principe will enable the design of appropriate planning  
115 to prevent this major public health problem since, for appropriate prevention of fetal and  
116 newborn mortality, data pertaining to its determinants are important.

117 To the best of our knowledge, this is the first study to assess peri-neonatal mortality in STP,  
118 and it was undertaken within the context of a broader project on neonatal adverse birth  
119 outcomes (ABOs) in this LMIC [23-25].

120 Therefore, we conducted a prospective cohort study to identify the most important factors  
121 associated with mortality among newborns delivered at HAM.

122

123

124

125

126

127

128

129

130

131

132

133

134

135

136

137

138

139

140

141

142

143

144

## 145 **Materials and methods**

---

146

### 147 **Study design**

148 An institution-based prospective cohort study was conducted at Hospital Dr. Ayres de  
149 Menezes (HAM) for mother-neonate dyads followed up until the 28<sup>th</sup> day after delivery  
150 (neonatal period).

151

### 152 **Setting**

153 The archipelago of Sao Tome & Principe is one of the smallest sub-Saharan African (SSA)  
154 countries, with approximately 200.000 inhabitants and a total land surface of approximately  
155 1,001 km<sup>2</sup> on two islands (Sao Tome and a smaller island named Principe) [16,17]. The rural  
156 districts have ANC services and maternity units with basic obstetric services in Lembá,  
157 Lobata, Caué, Me-Zochi, and Principe Island, except for the district of Cantagalo. There is  
158 only one hospital in the country, Hospital Dr. Ayres de Menezes (HAM), with the only  
159 maternity in the country with Comprehensive Emergency Obstetric and Neonatal Care  
160 (EmONC) capable of providing blood transfusions and performing cesarean sections [26]. As  
161 a tertiary healthcare facility, HAM receives the most complicated cases from facilities in  
162 lower levels of care. There is no health insurance policy in the country or any private  
163 maternity units. In STP, there are approximately 3.2 doctors per 10 000 inhabitants and 27  
164 nurses per 10 000 inhabitants, and at HAM, there are three to four obstetricians and one to  
165 two general doctors who provide care to the neonates [26]. There are no neonatologists in the  
166 country. The midwives in the labor ward are responsible for the initial resuscitation of normal  
167 deliveries, and doctors from the pediatric department are called to the labor ward to attend  
168 babies in distress.

169 The HAM maternity unit has a facility-based clinical care unit for ill newborn babies, but  
170 there is no neonatal or child intensive care unit in the country. The Neonatal Care Unit  
171 (NCU) receives high-risk babies delivered within the institution and referrals from other  
172 health facilities or from home with a total capacity to admit six babies. This unit, like others  
173 in SSA settings, is basic and able to manage simple neonatal complications such as  
174 hypothermia, feeding problems and sepsis suspicion. Although NCU was rebuilt in 2016,  
175 there is still a lack of continuous positive airway pressure therapy, surfactant therapy and  
176 enteric feeding for assisting sick babies.

177

### 178 **Study population and follow-up**

179 All mother-neonate dyads admitted to the HAM maternity unit for childbirth constituted the  
180 source population whereas the study populations were selected neonates delivered in the  
181 HAM maternity unit during the study period. Recruitment of participants (mother-newborn  
182 dyad) occurred from July 2016 to November 2018. During the study period, 4540 deliveries  
183 were recorded, corresponding to 450 cesarean deliveries and 3740 normal vaginal births.

184 The inclusion criteria for participants were as follows: 1) all neonates delivered at HAM with  
185 a gestational age of 28 weeks or more and 2) newborns who were born outside the hospital  
186 but were later admitted at HAM. A total of 537 newborns were initially enrolled.

187 The exclusion criteria included the following: 1) all neonates delivered at HAM with a  
188 gestational age of less than 28 weeks, 2) newborns whose mothers had no antenatal  
189 pregnancy card, 3) newborns whose mothers had cognitive impairment. The newborn was  
190 also excluded if his health status was unknown at his twenty-eight days of life.

191 Consenting participants in the sample were followed up (mother-newborn dyad) throughout  
192 their stays until hospital discharge. The survival status of neonates after discharge was  
193 ascertained by making a follow-up mobile phone call at the end of the neonatal period. Those



194 who could not be reached by phone after four attempts in different weeks were taken as  
195 nonrespondents, and the mother-newborn dyad was excluded. A flowchart of participation in  
196 the study is shown in Fig 1.

197

198 **Figure 1** Flowchart of participation in the study

199

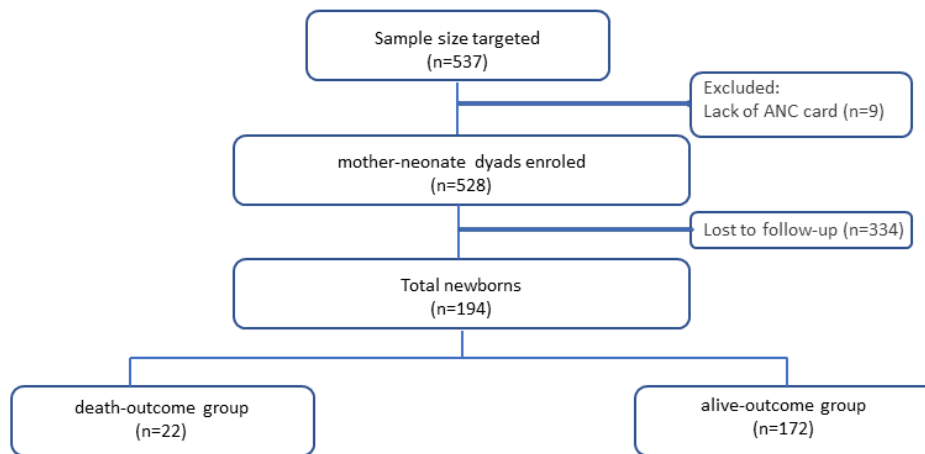

200

201

## 202 **Sampling method**

203 This is a substudy undertaken to estimate adverse birth outcomes (ABOs) and related risk  
204 factors in the country.

205 The sample size initially calculated for the broader project, using Raosoft®  
206 (<http://www.raosoft.com/samplesize.html>), was based on the formula for sample size and  
207 margin of error from the software, reaching the minimum sample size of  $S_{95\%} = 355$ , with 355  
208 (95%) and 579 (99%) interval confidence. The original study included 537 mother-neonate  
209 dyads enrolled based on the following assumptions: two-sided 95% confidence level, power  
210 of 80% to detect an odds ratio of at least two for ABO. Since the sample size was not  
211 calculated for present outcomes, to assess peri-neonatal mortality, a power analysis was

212 performed, varying from 77% to 87% for outcomes such as gestational age (GA<37) for this  
213 study. In this study, 194 mother-neonate dyads were included. Participants were selected  
214 through random sampling. Each morning, from the pile of mothers' medical folders, every  
215 second interval folder was selected and then carried on requesting contentment for  
216 enrollment. To guarantee a sample with few biases and effects by means of confounding  
217 variables, the study was conducted in different months (two weeks every two other months),  
218 avoiding seasonal interference (rain season and malaria period). Women were interviewed  
219 only after the delivery, although the invitation and consent were obtained during her  
220 admission to the maternity unit before birth (live birth or stillbirth).

221

#### 222 **Selection of groups: death and alive neonatal outcome**

223 A total of 194 mother-neonate dyads were included and were divided into two groups  
224 according to the newborn status (alive versus dead) at the end of the neonatal period.  
225 Newborns who died before the 28<sup>th</sup> day of life (death-outcome group with stillbirths included;  
226 n=22) were compared with newborns alive at the 28<sup>th</sup> day of life (alive-outcome group;  
227 n=172) concerning maternal, antepartum, and intrapartum characteristics.

228

#### 229 **Study Variables**

230 The dependent variables for the study were death (stillbirth and neonatal - early and late -  
231 death) and live newborns.

232 The definition of stillbirth used was the WHO/ICD (for international comparison and  
233 reporting) as a baby born without any signs of life at or after 28 weeks of gestation or at least  
234 1000 g in birth weight. [9,27]. Stillbirths were also described according to whether they were  
235 an intrapartum or antepartum stillbirth. Intrapartum stillbirth was defined as a dead-born fetus  
236 where intrauterine death occurred after the onset of labor and before birth (fresh stillbirth)

237 [9]. Antepartum stillbirth is a dead born fetus where intrauterine death occurs before the onset  
238 of labor (macerated stillbirth) [9].

239 Neonatal mortality was defined as deaths in the first 28 days of life among live births. Death  
240 within the first 24 h (<24 h) or first day of life was recorded in units of completed minutes or  
241 hours of life [2]. Deaths occurring  $\geq 24$  h of life were recorded in days, from day 1 to 27  
242 completed days [2]. The neonatal death definition used in this study was the one from the  
243 World Health Organization (WHO) as “deaths among live births during the first 28  
244 completed days of life” [1], which were further subdivided into early neonatal deaths  
245 (ENND) as deaths between 0 and 7 completed days of birth and late neonatal deaths (LNND)  
246 as deaths after 7 days to 28 completed days of birth [2,28].

247 For neonates who died at home after discharge, probable causes of death were assigned by  
248 the principal investigator (pediatrician) using the International Statistical Classification of  
249 Diseases and Related Health Problems ICD-11 coding. For neonates who died in the HAM,  
250 the cause of death was assigned by physicians, who work in the hospital, and confirmed by  
251 the principal investigator.

252

253 The independent variables tested in this study included factors grouped into five categories:  
254 1) newborns’ maternal sociodemographic factors (age, educational status, occupation,  
255 marital status, partner’s education, and residence); 2) preconception factors (previous  
256 contraceptive utilization), plus current obstetric condition (gravidity, parity, previous abortion  
257 and stillbirth, previous cesarean section and preceding birth interval); 3) ANC service  
258 (number of visits, gestational age at first ANC visit, obstetric ultrasound, number of fetuses in  
259 the ultrasound) plus antepartum factors as positive ANC screenings (high-pregnancy risk  
260 score, maternal anemia as hemoglobin concentration  $< 11$  g/dl, bacteriuria, hyperglycemia, Rh  
261 incompatibility, intestinal parasitic infection (IPI), malaria, HIV, syphilis, hepatitis B virus

262 and sickle cell); 4) health facility-related factors (being transferred from another unit, who  
263 assisted the delivery and partograph use) plus intrapartum factors as mode of delivery and  
264 complications (fetal malpresentation [29], umbilical cord complication [30], prolonged  
265 rupture of membranes [31,32], meconium-stained amniotic fluid [33], postpartum  
266 hemorrhage as bleeding >500 mL, preeclampsia defined as hypertension  $\geq 140/90$  mmHg and  
267 proteinuria in dipsticks in women who were normotensive at ANC, and obstructed labor  
268 [34]); 5) newborns characteristics as (gestational age, sex, birth weight) and complications  
269 (intrauterine growth restriction (IUGR), congenital anomalies, infectious risk, neonatal  
270 resuscitation, fetal distress at birth, birth asphyxia and admission at NCU) [35-37].

271

#### 272 **Data collection**

273 Data on antepartum, intrapartum, and postpartum characteristics of participants were gathered  
274 and collected from ANC pregnancy cards, obstetric maternal and newborn clinical records.  
275 For antepartum data, relevant details of the perinatal history and antenatal period were  
276 collected systematically from the ANC pregnancy card. Intrapartum data were collected from  
277 labor follow-up sheets, delivery summaries and maternal medical records. Postpartum data  
278 were abstracted from newborn birth charts and/or newborn medical records if admitted to the  
279 NCU.

280 Maternal sociodemographic characteristics were supplemented with a structured administered  
281 questionnaire through a face-to-face interview of the mothers 12-24 hours after delivery,  
282 similar to other studies from LMICs [38].

283

#### 284 **Data quality alive-outcome group**

285 The questionnaires were administered in Portuguese, the country national language. The  
286 questionnaire was pretested at HAM one month before data collection in 23 mothers, and

287 modification was made based on the pretest result, mainly adjusting terminology for more  
288 culturally friendly terms. Women’s consent to participate in the study was obtained at the  
289 time of admission at HAM, but the interview was held after a woman was stabilized and  
290 ready to be discharged. Continuous follow-up and supervision of data collection were made  
291 by the supervisors. The collected data were checked daily for completeness. The principal  
292 investigator (pediatrician) executed and was responsible for all main activities as follows: 1)  
293 obtaining consent and enrollment of the participants, 2) data collection from antenatal cards  
294 plus maternal clinical and newborns’ records, 3) newborns’ clinical observation (for  
295 diagnosis confirmation), 4) face-to-face interviews, 5) administering all phone interviews and  
296 6) data collection entry into the database.

297

298

### 299 **Data management**

300 The anonymity and safety of the participants were ensured. Data were secured in a  
301 confidential and private location. Participants were referred to by identification numbers, and  
302 the informed consent forms were kept separate from the questionnaires. Both could only be  
303 linked by a coding sheet available only to the principal investigator.

304

### 305 **Data analysis**

306 Data were entered into the QuickTapSurvey app (©2010-2021 Formstack), and the dataset  
307 was exported to Excel for cleaning and further analysis using the Statistical Package for the  
308 Social Sciences for Windows, version 25.0 (IBM Corp. Released 2017. IBM SPSS Statistics  
309 for Windows, Version 25.0. Armonk, NY: IBM Corp.). All data were checked for  
310 completeness and accuracy by the principal investigator and a qualified biostatistician.

311 Descriptive statistics, namely, frequencies and percentages were estimated. A univariable  
312 analysis was also performed. In this study, the neonatal death-outcome group was coded as 1,  
313 and the neonatal alive-outcome group was coded as 0. The proportion of missing data ranged  
314 from 0.8 to 10% across variables, and missing values higher than 10% were described in the  
315 analysis.

316

317 Univariable logistic regression analysis was used to estimate the unadjusted effect of each  
318 independent variable on the dependent variable. Variables that had a p value less than 0.25  
319 were considered in the multivariable model. A p value  $< 0.05$  was considered statistically  
320 significant in multivariable logistic regression analysis.

321

### 322 **Ethics approval and consent to participate**

323 The Ministry of Health of Sao Tome & Principe and the main board of the Hospital Dr. Ayres  
324 de Menezes are dedicated ethics oversight bodies, and both approved this study. At the time  
325 of the study protocol was submitted (year 2016), there were no ethics committees in STP. All  
326 methods were performed in accordance with the relevant guidelines and regulations in  
327 practice. Written informed consent was obtained from all participants (or their parent or legal  
328 guardian in the case of adolescent under 16 or for illiterate pregnant women) after the  
329 purpose of the research was explained orally by the principal investigator. Participants' or  
330 their legal representatives' also consented to have the results of this research work published.  
331 Participation in the survey was voluntary, as participants could decline to participate at any  
332 time during the study.

333

334

335

336

337

338 **Results**

---

339

340 A total of 194 newborns were followed up during their first 28 days of life. In this study, the  
341 newborn's mean gestational age (GA) was 38.86 weeks with a standard deviation (SD) of  
342 2.26 (minimum 28 - maximum 42 weeks). The death-outcome group (n=22) had a mean GA  
343 and birth weight of 36 (SD=4.83) and 2515 (SD=997) g, respectively, while their  
344 counterparts (172 in the alive-outcome group) had 39 (SD=1.41) weeks and 3209 (SD=507)  
345 g, respectively. The mean maternal age was 27.14 years, with a SD of 6.86 (minimum 15 -  
346 maximum 43) years old. The mean maternal age for the death-outcome group and alive-  
347 outcome group was 30.73 (SD=7.45) and 26.68 (SD=6.66) years, respectively.

348

349 The death-outcome group under-study included 16 stillbirths (72.7%), four (18%) ENND and  
350 two (9%) LNND. Stillbirths were 69% intrapartum stillbirths (fresh stillbirths), and 31% were  
351 antepartum stillbirths (macerated stillbirths). Stillbirth characteristics are further described in  
352 Additional file 1, and the early and late neonatal deaths (ENND and LNND) are described in  
353 Additional file 2.

354

355 The maternal characteristics as well as antepartum, intrapartum, and postpartum factors for  
356 the total of the participants and for the death-outcome group versus the alive-outcome group  
357 are described in Tables 1 and 2.

358

359 There were no maternal deaths in this study, with a total of 2 maternal near-misses occurring  
 360 in the stillbirths' mothers' death-outcome group numbers 5 and 11 that needed hysterectomy  
 361 intervention due to atonic uterus with major obstetric hemorrhage.

362

363 **Table 1** Univariable logistic regression analysis of peri-neonatal mortality among newborns admitted  
 364 at HAM, Sao Tome & Principe (n= 194; death-outcome group :22 and alive-outcome group: 172)

| Variables                               | Categories       | Total<br>n=194 | Death-outcome<br>group<br>n=22<br>n (%) | Alive-<br>outcome<br>group<br>n=172<br>n (%) | cOR   | (95%) CI    | p<br>value   |
|-----------------------------------------|------------------|----------------|-----------------------------------------|----------------------------------------------|-------|-------------|--------------|
| <b>Sociodemographic characteristics</b> |                  |                |                                         |                                              |       |             |              |
| Mother's age                            | 14-19            | 28 (14.4)      | 3 (13.6)                                | 25 (14.5)                                    | 1     |             |              |
|                                         | 20-34            | 131 (67.5)     | 11 (50.0)                               | 120 (69.8)                                   | 0.764 | 0.199-2.939 | 0.695        |
|                                         | ≥35              | 35 (18)        | 8 (36.4)                                | 27 (15.7)                                    | 2.469 | 0.588-10.36 | 0.217        |
| Mother's education                      | none+primary     | 106 (54.6)     | 19 (86.4)                               | 87 (50.6)                                    | 1     |             |              |
|                                         | secondary        | 88 (45.4)      | 3 (13.6)                                | 88 (45.4)                                    | 0.162 | 0.046-0.566 | <b>0.004</b> |
| Mother's occupation                     | unemployed       | 139 (72.0)     | 16 (72.7)                               | 123 (71.9)                                   | 1     |             |              |
|                                         | employed         | 54 (28)        | 6 (27.3)                                | 48 (28.1)                                    | 0.961 | 0.355-2.601 | 0.961        |
| Marital status                          | union/married    | 124 (63.9)     | 14 (63.6)                               | 110 (64)                                     | 0.986 | 0.392-2.482 | 0.977        |
|                                         | single           | 70 (36.1)      | 8 (36.4)                                | 62 (36)                                      | 1     |             |              |
| Baby's father education                 | none+<br>primary | 63 (41.7)      | 9 (81.8)                                | 54 (38.6)                                    | 1     |             |              |
|                                         | secondary        | 88 (58.3)      | 2 (18.2)                                | 86 (61.4)                                    | 0.14  | 0.029-0.67  | <b>0.014</b> |
| Residence <sup>1</sup>                  | urban            | 92 (48.2)      | 9 (45)                                  | 83 (48.5)                                    | 0.867 | 0.342-2.200 | 0.765        |
|                                         | rural            | 99 (51.8)      | 11 (55)                                 | 88 (51.5)                                    | 1     |             |              |
| <b>Preconceptional</b>                  |                  |                |                                         |                                              |       |             |              |
| Contraception previous use              | yes              | 38 (24.8)      | 3 (20)                                  | 35 (25.4)                                    | 0.736 | 0.196-2.760 | 0.649        |
|                                         | no               | 115 (75.2)     | 12 (80)                                 | 103 (74.6)                                   | 1     |             |              |

365

|                                 |     |            |           |            |       |              |       |
|---------------------------------|-----|------------|-----------|------------|-------|--------------|-------|
| <b>Obstetric history</b>        |     |            |           |            |       |              |       |
| Gravidity                       | 1   | 42 (21.6)  | 4 (18.2)  | 38 (22.1)  | 1     |              |       |
|                                 | 2-5 | 100 (51.5) | 8 (36.4)  | 92 (53.5)  | 0.826 | 0.235-2.907  | 0.766 |
|                                 | ≥5  | 52 (26.8)  | 10 (45.5) | 42 (24.4)  | 2.262 | 0.655-7.815  | 0.197 |
| Parity                          | 0   | 53 (27.3)  | 5 (22.7)  | 48 (27.9)  | 1     |              |       |
|                                 | 1-4 | 121 (62.4) | 12 (54.5) | 109 (63.4) | 1.057 | 0.353-3.166  | 0.921 |
|                                 | ≥5  | 20 (10.3)  | 5 (22.7)  | 15 (8.7)   | 3.200 | 0.814-12.574 | 0.096 |
| Previous abortion               | yes | 59 (30.4)  | 6 (27.3)  | 53 (30.8)  | 0.842 | 0.312-2.272  | 0.734 |
|                                 | no  | 135 (69.6) | 16 (72.7) | 119 (69.2) | 1     |              |       |
| Previous stillbirth             | yes | 17 (8.8)   | 4 (18.2)  | 13 (7.6)   | 2.718 | 0.801-9.225  | 0.109 |
|                                 | no  | 177 (91.2) | 18 (81.8) | 159 (92.4) | 1     |              |       |
| Poor birth spacing <sup>2</sup> | yes | 39 (20.1)  | 6 (27.3)  | 33 (19.2)  | 1.580 | 0.574-4.346  | 0.376 |
|                                 | no  | 155 (79.9) | 16 (72.7) | 139 (80.8) | 1     |              |       |



| <b>Antenatal care</b> |     |            |          |            |       |             |       |
|-----------------------|-----|------------|----------|------------|-------|-------------|-------|
| GA at first ANC visit | ≤12 | 98 (60.5)  | 6 (27.3) | 92 (53.5)  | 1     |             |       |
|                       | >12 | 58 (35.8)  | 9 (40.9) | 55 (32)    | 2.509 | 0.847-7.430 | 0.097 |
| Number of ANC visits  | 1-4 | 19 (10.1)  | 2 (10)   | 17 (10.1)  | 1     |             |       |
|                       | 5-7 | 84 (44.4)  | 16 (80)  | 68 (40.2)  | 2.000 | 0.419-9.547 | 0.385 |
|                       | ≥ 8 | 86 (45.5)  | 2 (10)   | 84 (49.7)  | 0.202 | 0.027-1.538 | 0.123 |
| Obstetric ultrasound  | 0   | 73 (38.4)  | 7 (35)   | 66 (38.8)  | 1     |             |       |
|                       | 1   | 87 (45.8)  | 12 (60)  | 75 (44.1)  | 1.509 | 0.561-4.056 | 0.415 |
|                       | 2   | 30 (15.8)  | 1 (5)    | 29 (17.1)  | 0.349 | 0.041-2.976 | 0.336 |
| Twin pregnancy        | yes | 14 (7.2)   | 0        | 14 (8.1)   | -     | -           | -     |
|                       | no  | 180 (92.8) | 22 (100) | 158 (91.9) | 1     |             |       |

366

367

| <b>Antenatal care screenings</b>               |            |            |           |            |       |              |              |
|------------------------------------------------|------------|------------|-----------|------------|-------|--------------|--------------|
| High-pregnancy risk <sup>3</sup>               | yes        | 70 (36.1)  | 13 (59.1) | 57 (33.1)  | 2.914 | 1.176-7.220  | <b>0.021</b> |
|                                                | no         | 124 (63.9) | 9 (40.9)  | 115 (66.9) | 1     |              |              |
| Maternal disease during pregnancy <sup>4</sup> | yes        | 123 (63.4) | 11 (50)   | 112 (65.1) | 0.622 | 0.244-1.587  | 0.321        |
|                                                | no         | 66 (34)    | 9 (40.9)  | 57 (33.1)  | 1     |              |              |
|                                                | missing    | 5 (2.6)    | 2 (9.1)   | 3 (1.7)    | 4.222 | 0.618-28.867 | 0.142        |
| Maternal anaemia <sup>5</sup>                  | yes        | 59 (30.4)  | 6 (27.3)  | 53 (30.8)  | 1.736 | 0.533-5.655  | 0.360        |
|                                                | no         | 98 (50.5)  | 6 (27.3)  | 92 (53.5)  | 1     |              |              |
|                                                | not tested | 37 (19.1)  | 10 (45.5) | 27 (15.7)  | 5.679 | 1.892-17.048 | 0.002        |
| Bacteriuria                                    | yes        | 62 (32)    | 5 (22.7)  | 57 (33.1)  | 0.593 | 0.208-1.690  | 0.328        |
|                                                | no         | 132 (68)   | 17 (77.3) | 115 (66.9) | 1     |              |              |
| Hyperglycaemia <sup>6</sup>                    | yes        | 8 (4.1)    | 1 (4.5)   | 7 (4.1)    | 1.122 | 0.132-9.578  | 0.916        |
|                                                | no         | 186 (95.9) | 21 (95.5) | 165 (95.9) | 1     |              |              |
| Rh incompatibility                             | yes        | 7 (3.6)    | 0         | 7 (4.1)    | -     | -            | -            |
|                                                | no         | 187 (96.4) | 22 (100)  | 165 (95.9) |       |              |              |
| IPIs                                           | yes        | 98 (50.5)  | 8 (36.4)  | 90 (52.3)  | 0.521 | 0.208-1.305  | 0.164        |
|                                                | no         | 96 (49.5)  | 14 (63.6) | 82 (47.7)  |       |              |              |
| Malaria                                        | yes        | 1 (0.5)    | 0         | 1 (0.6)    | -     | -            | -            |
|                                                | no         | 193 (99.5) | 22 (100)  | 171 (99.4) |       |              |              |
| HIV                                            | yes        | 2 (1.0)    | 1 (5.0)   | 1 (0.6)    | 1     |              |              |
|                                                | no         | 192 (99)   | 19 (95)   | 163 (99.4) | 0.123 | 0.007-2.037  | 0.143        |
| HsAg positive                                  | yes        | 6 (3.1)    | 2 (9.1)   | 4 (2.3)    | 1     |              |              |
|                                                | no         | 113 (58.2) | 10 (45.5) | 103 (59.9) | 0.194 | 0.032-1.195  | 0.077        |
| Sickle cell positivity <sup>7</sup>            | yes        | 13 (6.8)   | 1 (4.5)   | 12 (7.0)   | 0.631 | 0.078-5.102  | 0.666        |
|                                                | no         | 181 (93.2) | 21 (95.5) | 160 (93)   | 1     |              |              |

368

| <b>Health facility-related factors</b> |              |            |           |            |       |              |              |
|----------------------------------------|--------------|------------|-----------|------------|-------|--------------|--------------|
| Baby delivered at HAM                  | yes          | 188 (96.9) | 21 (95.5) | 167 (97.1) | 1.590 | 0.177-14.275 | 0.679        |
|                                        | no           | 6 (3.1)    | 1 (4.5)   | 5 (2.9)    | 1     |              |              |
| Transferred from another unit*         | yes          | 16 (8.2)   | 6 (27.3)  | 10 (5.8)   | 6.075 | 1.953-18.900 | <b>0.002</b> |
|                                        | no           | 178 (91.8) | 16 (72.7) | 162 (94.2) | 1     |              |              |
| Delivery assisted by                   | obstetrician | 36 (18.6)  | 5 (22.7)  | 31 (18)    | 1     |              |              |
|                                        | midwife      | 153 (78.9) | 16 (72.7) | 137 (79.7) | 0.724 | 0.247-2.126  | 0.557        |
|                                        | home labor   | 5 (2.6)    | 1 (4.5)   | 4 (2.3)    | 1.550 | 0.143-16.852 | 0.719        |

|                                             |     |            |           |            |       |              |              |
|---------------------------------------------|-----|------------|-----------|------------|-------|--------------|--------------|
| Partograph use                              | yes | 76 (39.2)  | 9 (40.9)  | 67 (39)    | 1.085 | 0.440-2.678  | 0.860        |
|                                             | no  | 118 (60.8) | 13 (59.1) | 105 (61)   | 1     |              |              |
| Fetal malpresentation <sup>8</sup>          | yes | 2 (1)      | 0         | 2 (1.2)    | -     | -            | -            |
|                                             | no  | 192 (99)   | 22 (100)  | 170 (98.8) |       |              |              |
| PROM <sup>9</sup>                           | yes | 15 (8.1)   | 5 (23.8)  | 10 (6.1)   | 4.844 | 1.473-15.930 | <b>0.009</b> |
|                                             | no  | 171 (91.9) | 16 (76.2) | 155 (93.9) | 1     |              |              |
| Pre/Eclampsia <sup>10</sup>                 | yes | 17 (8.8)   | 2 (9.1)   | 15 (8.7)   | 1.047 | 0.223-4.917  | 0.954        |
|                                             | no  | 177 (91.2) | 20 (90.9) | 157 (91.3) | 1     |              |              |
| Obstructed labour <sup>11</sup>             | yes | 22 (11.3)  | 4 (18.2)  | 18 (10.5)  | 1.901 | 0.579-6.239  | 0.289        |
|                                             | no  | 172 (88.7) | 18 (81.8) | 154 (89.5) | 1     |              |              |
| Postpartum haemorrhage <sup>12</sup>        | yes | 2 (1)      | 0         | 2 (1.2)    | -     | -            | -            |
|                                             | no  | 192 (99)   | 22 (100)  | 170 (98.8) |       |              |              |
| Normal Vaginal delivery                     | yes | 155 (79.9) | 15 (68.2) | 140 (81.4) | 0.490 | 0.185-1.300  | 0.152        |
|                                             | no  | 39 (20.1)  | 7 (31.8)  | 32 (18.6)  |       |              |              |
| Caesarean section                           | yes | 33 (17)    | 4 (18.2)  | 29 (16.9)  | 1.096 | 0.345-3.477  | 0.877        |
|                                             | no  | 161 (83)   | 18 (81.8) | 143 (83.1) |       |              |              |
| Previous caesarean                          | yes | 10 (5.2)   | 2 (9.1)   | 8 (4.7)    | 2.050 | 0.407-10.333 | 0.384        |
|                                             | no  | 184 (94.8) | 20 (90.9) | 164 (95.3) |       |              |              |
| Instrumental vaginal delivery <sup>13</sup> | yes | 6 (3.1)    | 3 (13.6)  | 3 (1.7)    | 8.895 | 1.676-47.208 | <b>0.010</b> |
|                                             | no  | 188 (96.9) | 19 (86.4) | 169 (98.3) |       |              |              |
| Meconium-stained amniotic fluid             | yes | 43 (22.2)  | 11 (50)   | 32 (18.6)  | 4.375 | 1.744-10.975 | <b>0.002</b> |
|                                             | no  | 151 (77.8) | 11 (50)   | 140 (81.4) |       |              |              |
| Umbilical cord complication                 | yes | 8 (4.1)    | 1 (4.5)   | 7 (4.1)    | 1.122 | 0.132-9.578  | 0.916        |
|                                             | no  | 186 (95.9) | 21 (95.5) | 165 (95.9) |       |              |              |

369

| <b>Newborn's characteristics</b> |              |            |           |            |        |              |                  |
|----------------------------------|--------------|------------|-----------|------------|--------|--------------|------------------|
| Gestational Age <sup>14</sup>    | 28 - 31      | 3 (1.5)    | 3 (13.6)  | 0          | 1      |              |                  |
|                                  | 32 - 36      | 8 (4.1)    | 4 (18.2)  | 4 (2.3)    | -      | -            | -                |
|                                  | 37 - 41      | 176 (90.7) | 15 (68.2) | 161 (93.6) | -      | -            | -                |
|                                  | ≥42          | 7 (3.6)    | 0         | 7 (4.1)    | -      | -            | -                |
| Sex                              | feminine     | 92 (47.4)  | 6 (27.3)  | 86 (50)    | 0.375  | 0.140-1.004  | <b>0.051</b>     |
|                                  | masculine    | 102 (52.6) | 16 (72.7) | 86 (50)    |        |              |                  |
| Birth weight <sup>15</sup>       | <1500 g      | 5 (2.6)    | 4 (18.2)  | 1 (0.6)    | 1      |              |                  |
|                                  | 1500-2499 g  | 18 (9.3)   | 7 (31.8)  | 11 (6.4)   | 0.159  | 0.015-1.732  | 0.131            |
|                                  | 2500g-3999 g | 161 (83)   | 10 (45.5) | 151 (87.8) | 0.017  | 0.002-0.162  | <b>&lt;0.001</b> |
|                                  | ≥ 4000 g     | 10 (5.2)   | 1 (4.5)   | 9 (5.2)    | 0.028  | 0.001-0.564  | <b>0.020</b>     |
| IUGR <sup>16</sup>               | yes          | 9 (4.6)    | 6 (27.3)  | 3 (1.7)    | 21.125 | 4.82-92.586  | <b>&lt;0.001</b> |
|                                  | no           | 185 (95.4) | 16 (72.7) | 169 (98.3) | 1      |              |                  |
| Infectious risk <sup>17</sup>    | yes          | 50 (25.8)  | 14 (63.6) | 36 (20.9)  | 6.611  | 2.574-16.978 | <b>&lt;0.001</b> |
|                                  | no           | 144 (74.2) | 8 (36.4)  | 136 (79.1) |        |              |                  |
| Congenital malformation          | yes          | 4 (2.1)    | 4 (18.2)  | 0          | -      | -            | -                |
|                                  | no           | 190 (97.9) | 18 (81.8) | 172 (100)  |        |              |                  |

370

371 This is the Table 1 legend.

372 Abbreviations: ANC – antenatal care; CI – confidence interval; cOR: crude odds ratio; GA – gestational age; HAM: Hospital  
373 Dr. Ayres de Menezes; IPI – intestinal parasitic infection; IUGR – intrauterine growth restriction; PROM – prolonged rupture  
374 of membranes.

375 <sup>1</sup>Urban residence for women living in the capital city (Água Grande) and rural areas in all other districts (Mé-Zochi,  
376 Cantagalo, Lobata, Lembá, Caué and Príncipe Island).

377 <sup>2</sup>Poor birth spacing birth intervals of less than 2 years [39]

378 <sup>3</sup>High-pregnancy risk is registered in the ANC pregnancy card if the current pregnancy is defined as one or more of the  
379 following: 1) pregnant women age less than 15 years old or greater than 35, 2) grand multipara for women with six or more  
380 labors, 3) previous history of a stillbirth or early neonatal death, 6) previous caesarean section, and 7) previous hemorrhagic  
381 complication.

382 <sup>4</sup>Maternal disease was operationally defined as one or more of the following conditions during the current pregnancy:  
383 pre/eclampsia, gestational diabetes, malaria, bacteriuria, anemia, and intestinal parasitic infection.

384 <sup>5</sup>anaemia during pregnancy as a hemoglobin concentration <11 g/dl

385 <sup>6</sup>glycaemia >105 mg/dL,

386 <sup>7</sup>Through a sickle cell solubility test, which involves treating a thin blood film with sodium dithionate under hypoxic conditions  
387 and observing for sickling under a light microscope, that is the screening technique available in STP and performed to  
388 pregnant women with anemia or clinical suspicion. A positive result can suggest either sickle cell anemia or the sickle cell  
389 trait [40].

390 <sup>8</sup>Foetal malpresentation was determined if the presenting fetal part was noncephalic (e.g. breech, transverse, oblique) [29].

391 <sup>9</sup>Prolonged rupture of membrane (PROM) was defined as a rupture of membrane lasting longer than 18 hours before labor  
392 began [31,32].

393 <sup>10</sup>Preeclampsia (hypertension  $\geq 140/90$  mmHg and proteinuria in dipsticks in women who were normotensive at ANC).

394 <sup>11</sup>Obstructed labor was operationally defined as the sum of all cesarean sections due to mechanical problems or fetal  
395 distress and all instrumental delivery [34].

396 <sup>12</sup>Postpartum hemorrhage was defined as >500 mL bleeding.

397 <sup>13</sup>IVD in STP is only performed by vacuum.

398 <sup>14</sup>Gestational age was estimated from the date of onset of the last normal menstrual period or through ultrasound dating of  
399 pregnancy. Prematurity was defined as a delivery before 37 complete weeks of gestation from the date of onset of the last  
400 normal menstrual period and subcategorized as very preterm (28 to 31 weeks) and moderate to late preterm (32 to 37  
401 weeks).

402 <sup>15</sup>Low birth weight was defined as a newborn weight less than 2500 grams (up to and including 2499 g) at birth regardless  
403 of gestational age. Low birth weight was further categorized into very low birth weight (VLBW, <1500 g) [41]. Low birth  
404 weight is a result of preterm birth, intrauterine growth restriction or both [41].

405 Large birth weight when  $\geq 4000$  g (macrosomia) irrespective of gestational age.

406 <sup>16</sup>There is still no consensual definition for intrauterine growth restriction (IUGR) or fetal growth restriction in Africa [42]. In  
407 this study, it was defined as the term LBW (i.e., birthweight <2500 g and gestational age  $\geq 37$  weeks of gestation) due to low  
408 in utero measurements through obstetric ultrasounds in the country [42].

409 <sup>17</sup>Infectious risk was operationally defined as the sum of all the following risk factors: 1) maternal fever (axillary temperature  
410  $>37.9$  C) at the time of delivery, 2) prolonged rupture of membrane ( $\geq 18$  hours), and/or 3) foul-smelling amniotic fluid [43].

411

### 412 **Factors associated with perinatal and neonatal mortality**

413 Binary logistic regression analysis was performed to assess the association of peri-neonatal  
414 mortality with several characteristics (Table 1 and Table 2). Crude analysis showed that  
415 meconium-stained amniotic fluid, prolonged rupture of membranes, transfer from another  
416 unit, and instrumental vaginal delivery were significantly associated with peri-neonatal  
417 mortality.

418

#### 419 Sociodemographic factors

420 A maternal secondary education level (cOR 0.162, 95% CI 0.46–0.566,  $p=0.004$ ) and a  
421 baby's father secondary education level (cOR 0.140, 95% CI 0.029–0.67,  $p=0.014$ ) were  
422 found to be protective factors for peri-neonatal mortality.

423

#### 424 Antepartum factors

425 The odds of peri-neonatal mortality were three times higher among mothers classified as  
426 having a high-pregnancy risk (cOR 2.91, 95% CI 1.18–7.22,  $p=0.021$ ). Mothers without  
427 hemoglobin test during the ANC follow-up had a higher risk of having a peri-neonatal death  
428 (cOR 5.68, 95% CI 1.89–17.05,  $p=0.002$ ) than those without anemia.

429

430 Health facility-related factors

431 The odds of peri-neonatal mortality were six times higher among mothers transferred from  
432 another unit compared to those directly admitted at HAM maternity (cOR 6.08, 95% CI 1.95–  
433 18.90,  $p=0.002$ ).

434

435 Intrapartum factors

436 PROM as well as meconium-stained amniotic fluid were other intrapartum factors, with the  
437 odds of mortality being almost five times higher for newborns whose mothers had a PROM  
438 (cOR 4.84, 95% CI 1.47–15.93,  $p=0.009$ ), and four times higher for those with a meconium-  
439 stained amniotic fluid (cOR 4.38, 95% CI 1.74–10.98,  $p=0.002$ ).

440 For the mode of delivery, having an instrumental assisted delivery was associated with an  
441 eightfold higher risk of perinatal and neonatal mortality (cOR 8.90, 95% CI 1.68–47.21,  
442  $p=0.010$ ).

443

444

445 Newborns' factors

446 Newborns with intrauterine growth restriction had a twenty-one-fold higher risk of mortality  
447 (cOR 21.13, 95% CI 4.82–92.59,  $p<0.001$ ), and newborns with an infectious risk had almost  
448 sevenfold higher odds of dying (cOR 6.61, 95% CI 2.57–16.98,  $p<0.001$ ). Regarding newborn  
449 characteristics, female neonates (cOR 0.38, 95% CI 0.14–1.00,  $p=0.051$ ) and birth weight  
450 greater than 2500 g and lower than 3999 g (cOR 0.017, 95% CI 0.002–0.162,  $p<0.001$ ), and  
451 greater than 4000 g (cOR 0.028, 95% CI 0.001–0.564,  $p=0.020$ ) were protective factors  
452 against peri-neonatal mortality.

453 Postpartum characteristics were only assessed for a total of six death-outcome group since  
 454 sixteen stillbirths were not further included for analysis. Performance of neonatal  
 455 resuscitation, fetal distress at birth (APGAR score at first-minute inferior to seven), birth  
 456 asphyxia, and admission to the neonatal care unit were all related to an increased risk for  
 457 neonatal mortality (Table 2).

458

459

460

461

462

463

464 **Table 2** Univariable logistic regression analysis of neonatal mortality among newborns who were live  
 465 births n= 178 [death-outcome group: 6 and alive-outcome group: 172]

| Variables                   | Categories | Total<br>n=178 <sup>‡</sup> | Death-outcome<br>group<br>n=6 <sup>⊥</sup><br>n (%) | Alive-outcome<br>group n=172<br>n (%) | cOR    | (95%) CI      | p value          |
|-----------------------------|------------|-----------------------------|-----------------------------------------------------|---------------------------------------|--------|---------------|------------------|
| Neonatal<br>resuscitation   | yes        | 7 (3.9)                     | 2 (33.3)                                            | 5 (2.9)                               | 16.700 | 2.457-113.495 | <b>0.004</b>     |
|                             | no         | 171 (96.1)                  | 4 (66.7)                                            | 167 (97.1)                            | 1      |               |                  |
| Fetal distress at<br>birth* | yes        | 26 (14.6)                   | 5 (83.3)                                            | 21 (12.2)                             | 35.952 | 4.004-322.859 | <b>0.001</b>     |
|                             | no         | 152 (85.4)                  | 1 (16.7)                                            | 151 (87.8)                            | 1      |               |                  |
| Birth asphyxia**            | yes        | 10 (5.6)                    | 4 (66.7)                                            | 6 (3.5)                               | 55.333 | 8.421-363.600 | <b>&lt;0.001</b> |
|                             | no         | 168 (94.4)                  | 2 (33.3)                                            | 166 (96.5)                            | 1      |               |                  |
| Admission at<br>NCU         | yes        | 15 (8.4)                    | 3 (50)                                              | 12 (7)                                | 13.333 | 2.425-73.310  | <b>0.003</b>     |
|                             | no         | 163 (91.6)                  | 3 (50)                                              | 160 (93)                              | 1      |               |                  |

466 This is the Table 2 legend.

467 Abbreviations: CI – confidence interval; cOR: crude odds ratio; NCU – neonatal care unit.

468 <sup>‡</sup> stillbirths excluded

469 \*Fetal distress was defined as a low Apgar score <7 at the first minute of life (score from 0 to <7) [24,44].

470 \*\*Birth asphyxia was defined as a low Apgar score <7 at the fifth minute of life (score from 0 to <7) [24,44].

471

472 **Multivariable model**

473 Considering the small size of the outcome group (n=22), only one significant variable  
474 remained in the multivariable model. Newborns whose mothers had meconium-stained  
475 amniotic fluid were at a higher risk of peri-neonatal death.

476

477

478

## 479 **Discussion**

---

480

481 In this prospective cohort study, the main aim was to define risk factors, the most vulnerable  
482 period for neonatal death - partum, early or late neonatal period - and to identify where they  
483 die - in the maternity, at home or in the pediatric ward - as we were able to follow them up  
484 until their 28<sup>th</sup> day of life. In this study, we found that 90% died in HAM maternity before the  
485 7<sup>th</sup> day of life, that is, during the perinatal period, with mainly being stillborn (73%). The  
486 magnitude of stillbirths observed in this study (3%) is in line with the studies conducted in  
487 Nigeria (4.8%) [45] and Tanzania (3.5%) [46] and lower compared with studies from  
488 Ethiopia (6.7%) [47]. Most stillbirths occurred during intrapartum, as also identified in  
489 LMICs similar to STP, and most could have been prevented [48,49].

490 In this study, intrapartum characteristics, such as pregnant women with meconium-stained  
491 amniotic fluid, prolonged rupture of membranes, and instrumental vaginal delivery, were the  
492 main factors significantly associated with peri-neonatal death. Health facility-related factors,  
493 as pregnant women transferred from another unit were also at a significant risk.

494 High-pregnancy risk score notification was the only antepartum factor significantly  
495 associated with peri-neonatal mortality. For newborns, experiencing fetal distress at birth,  
496 needing resuscitation maneuvers, having birth asphyxia and admission to the neonatal unit  
497 were identified as high-risk factors for death. Being a female newborn and having a birth  
498 weight greater than 2500 grams were found to be protective factors.

499 Odds of experiencing death were identified as four times higher among newborns from  
500 mothers with meconium-stained amniotic fluid. This finding is consistent with studies from  
501 Ethiopia [6,50] and Yemen [12] that also reported higher rates of fetal death due to  
502 intrauterine passage of meconium into amniotic fluid and a fivefold increase in perinatal  
503 mortality compared with low-risk patients with clear amniotic fluid [51]. Meconium-stained



504 amniotic fluid is associated with fetal distress since the fetus, in response, inhales the  
505 meconium, which in turn leads to airway obstruction, surfactant dysfunction and  
506 pneumonitis, which leads to loss of the fetus [6].

507

508 PROM was also a significant factor associated with neonatal mortality in this study, showing  
509 fivefold higher odds for the death-outcome group. This association was also identified in  
510 other studies from low-resource constrained countries reporting one-third of stillbirths  
511 occurring during labor as a result of prolonged labor or obstructed labor not attended to  
512 promptly [35,36,38,52,53]. The reason for this might be because PROM is a risk factor for  
513 early-onset neonatal sepsis as well as a high risk of fetal distress, respiratory distress  
514 syndrome, intraventricular hemorrhage, and death [31,32,54]. In this study we found an  
515 overall prevalence of PROM of 8.1%, which is in accordance with the global incidence that  
516 ranges from approximately 5% to 10% of all deliveries in the world [54,55].

517

518 Lack of emergency obstetric care (EmOC) is well-known to increase the risk of neonatal  
519 mortality, as laboring mothers with complications cannot immediately receive appropriate  
520 health services, such as access to a cesarean section [36]. In this study, mothers who needed  
521 to be transferred from another health unit for delivery at HAM had a sixfold higher risk of  
522 having a neonatal death outcome than mothers directly admitted at HAM. Half the mothers  
523 who were transferred from the death-outcome group had to do a 60 -kilometer journey that  
524 took approximately two to three hours until reaching HAM maternity in the capital city.  
525 Distance from a health facility with EmOC and the considerable travel times are well-known  
526 barriers and influential factors of birth adverse outcomes also found in other studies in sub-  
527 Saharan Africa [56,57].

528

529 In this study, the overall rate of 3.1% of instrumental assisted vaginal birth deliveries was  
530 found to be lower compared to 17% of births by cesarean section and 79.9% of normal  
531 vaginal deliveries. Instrumental-assisted deliveries are an effective intervention for deliveries  
532 complicated by prolonged labor or fetal distress but are also related to adverse outcomes  
533 since fetal distress or cephalopelvic disproportion are more frequently the motive to use this  
534 technique. Therefore, the ninefold higher risk of death outcome found in this study, similar to  
535 other researchers reporting [13,58,59], relates to late appropriate intrapartum care  
536 intervention with subsequently higher rates of fetal distress and risk of an intrapartum  
537 stillbirth.

538

539 Antenatal care health services in STP follow a high-risk stratification for each pregnancy and,  
540 in this study, this notification of a high-risk pregnancy in the pregnant women antenatal  
541 pregnancy card was significantly associated with a threefold higher risk for fetal and neonatal  
542 death than alive-outcome group. High-pregnancy risk was operationally defined as one or  
543 more of the following according to STP national practice, namely, age as inferior to 15 years  
544 old or superior to 35, grand multipara, previous history of a stillbirth or early neonatal death,  
545 previous cesarean section, and previous hemorrhagic complication. This is consistent with  
546 other studies that reported higher rates of perinatal and neonatal mortality with extreme  
547 maternal ages and previous adverse obstetric history (grand multipara, previous stillbirth, or  
548 early neonatal death) [1,12]. However, in this study, we could not find a statistically  
549 significant difference between groups when each of these variables were independently  
550 analyzed.

551 Regarding the newborns' characteristics, the overall sex ratio at birth was 52.6% for males  
552 and 47.4% for females. The death rate was higher in male neonates (72%) than in the female  
553 death-outcome group (27.3%), with female sex being a protective factor. Sex variations are

554 frequently reported, with a highly consistent pattern of excess male mortality across different  
555 populations and income groups [60]. Male infants are more vulnerable to fetal and early  
556 neonatal death, with most studies reporting no gender difference in mortality after 7 days of  
557 age [60]. This sex difference may be explained by a sex-specific difference in the growth and  
558 function of male and female placentae, making boys more vulnerable to different adverse  
559 outcomes [60,62].

560

561 Birth weights of more than 2500 g were protective factors for death outcome in this study.  
562 This finding is comparable with different research on other African countries that associates a  
563 birth weight of less than 2500 g (LBW) with higher rates of stillbirth and neonatal death [1].  
564 Additionally, the odds of experiencing death were 21 times higher for babies with IUGR or  
565 fetal growth restriction defined, in this study, as a term LBW (birthweight <2500 g and  
566 gestational age  $\geq 37$  weeks) [42]. Low birth weight is a worldwide recognized important  
567 multifaceted public health problem since LBW infants are 20 times more likely to develop  
568 complications and die than normal weight infants [6,63].

569

570 We found that the odds of death were six times higher for newborns with maternal infectious  
571 risk. This finding is in agreement with previous studies conducted in SSA, as neonatal  
572 infectious risk is linked to amniotic fluid contamination that can cause intrapartum fetal  
573 infection or early postpartum neonatal infection with sepsis complicated with septic shock  
574 and multiple organ dysfunction, in which both are the most common causes of death in the  
575 perinatal period [35,43]. Infection is an important cause of stillbirth and neonatal death in  
576 LMICs, although there is a lack of overall information regarding the organisms involved, the  
577 types of transmission, and the mechanisms of death in these constrained countries [64]. In  
578 Sao Tome & Principe, malaria and syphilis are no longer an infection-burden and cause of

579 stillbirth or neonatal death; therefore, other bacterial and viral maternal infections should be  
580 linked to stillbirth and ENND [64]. In STP, there are no means to establish a neonatal  
581 infection through blood cultures; that is, neonatal infection is based only on clinical signs  
582 with no bacteriological documentation. Additionally, nothing is known about the rate of  
583 vertical transmission of Streptococcus Group B (GBS) from colonized mothers at birth in the  
584 country. Therefore, there is a current gap in the knowledge, capability of making diagnosis  
585 and prevention and treatment of neonatal infections in STP. For instance, a study from  
586 Ethiopia [64] detected that the rate of vertical transmission of GBS from colonized mothers at  
587 birth was as high as 45.02% due to term PROM, PROM  $\geq$ 18 hours before delivery and  
588 mothers having fever during labor. Detecting the risk for vertical transmission of GBS and  
589 implementing prevention methods such as adequate intrapartum administration of antibiotics  
590 are recognized as easy and affordable practices for reducing mortality due to infectious  
591 causes and should be implemented in the country along with culture techniques [43].

592 All four congenital major malformations detected in this study resulted in perinatal mortality,  
593 although due to the low number of newborns enrolled it was not possible to establish a  
594 statistically significant difference. Congenital malformations are known to be associated with  
595 poor outcomes for newborns, and 10–20% of stillbirths are attributed to intrinsic fetal  
596 anomalies [53]. Studies from Zimbabwe [65], Ethiopia [1] and Yemen [12] found that  
597 congenital anomalies among stillbirths were associated with a 5-fold [65], 34-fold [1] and 40-  
598 fold [12] higher risk than those among live births. Another important consideration regarding  
599 congenital anomalies is the type of malformation, since some, such as neural tube defects, are  
600 preventable and can be reduced by 30 to 50% by folic acid supplementation in pregnant  
601 women and have been estimated to cause 29% of deaths related to congenital anomalies in  
602 LMICs [4]. In this study, three out of the four major anomalies were neural tube defects,

603 highlighting the need to enhance proper supplementation to preconceptional women in the  
604 country.

605

606 In this study, we were not able to find a higher risk associated with newborn gestational age.  
607 The high rate of stillbirths found in our study as well as the low number of preterm babies  
608 enrolled (5.6%) explain the lack of association. Stillbirths are among the most common  
609 pregnancy-related adverse outcomes worldwide, but they differ between low- and high-  
610 income countries. In high-income countries, most stillbirths occur early in the preterm period,  
611 whereas in low resource constrained countries, most occur in term or in late preterm births, as  
612 found in our study [66]. Additionally, the neonatal mortality is higher in babies born between  
613 37 and 38 weeks of gestation than in those born between 39 and weeks [4].

614 From stillbirths in this study, 69% occurred during the intrapartum period, in accordance with  
615 other studies from LMICs [5]. These intrapartum stillbirths mean that intrauterine death  
616 occurred after the onset of labor and before birth (fresh stillbirth). We can also guess that  
617 some of them could be early neonatal deaths, as there are known barriers and difficulties in  
618 these contexts to establish whether a fetus or motionless newborn is living or dead after its  
619 delivery. For instance, information on some Apgar scores in these death-outcome group was  
620 not recorded, perhaps because of lack of time, especially when the neonates had to be rushed  
621 to receive resuscitation maneuvers. Studies from SSA highlight that it is very frequent that  
622 some depressed but living fetuses with a possible heartbeat do not receive resuscitation  
623 maneuvers and are promptly classified as stillbirths [1,66]. This is supported by a systematic  
624 review of sixteen hospitals and community-based perinatal mortality studies [67,68].

625 In this study, newborns who needed resuscitation maneuvers were at a 16-fold higher risk of  
626 dying. Additionally, the odds of neonatal death from fetal distress at birth and birth asphyxia  
627 were 36 and 55 times higher, respectively. These results are in line with studies conducted in

628 Cameroon [69] and Ethiopia [36] as well as published literature that suggests that lower  
629 APGAR scores are associated with severe multiorgan damage resulting in brain damage, lung  
630 dysfunction, cardiomyopathy, renal failure, hepatic failure, necrotizing enterocolitis and  
631 consequently death [70]. Previous studies [23,24] that compared outcomes between  
632 adolescent pregnant girls and older counterparts identified that adverse outcomes imputable  
633 to adolescent births were fetal distress (OR 1.94, 95% CI 1.18-3.18) and performance of  
634 neonatal resuscitation maneuvers (OR 2.4, 95% CI 1.07-5.38), highlighting the risks  
635 surrounding this period among deliveries at HAM maternity unit.

636 Perinatal asphyxia can be caused by factors grouped according to whether they are before  
637 birth (antepartum risk factors), during birth (intrapartum risk factors), or after birth  
638 (postpartum or fetal risk factors) [44,70]. Nonetheless, the single most important predictor is,  
639 undoubtedly, the quality of intrapartum care during labor and delivery.

640 The most important aspect of this study for public health is that it identifies potential  
641 characteristics that predispose newborns to life-threatening conditions, which is critical to  
642 address the underlying causes and provide prompt interventions by various stakeholders in  
643 the healthcare system [71].

644 This study allows us to perceive how to answer our question “when, where and why do  
645 newborns die in STP?” as “when”: mostly during labor, “where”: *in utero* and “why”:  
646 mainly due to fetal distress and intrapartum-related deaths probably due to low quality and  
647 constraints of care during labor and delivery. Ending preventable stillbirths and neonatal  
648 deaths does not necessarily require new or innovative interventions. Most modifiable risk  
649 factors identified in this study can be addressed and prevented with timely, quality care  
650 during childbirth, including ongoing intrapartum monitoring and opportune intervention in  
651 case of complications [72]. Some interventions, such as computerized cardiotocography to  
652 monitor a baby’s well-being in the womb by measuring contractions, are estimated to reduce

653 the rate of infant deaths around the time of birth by 80% when compared with traditional  
654 cardiotocography [73].

655 In summary, the findings of this study will be useful to health policymakers and program  
656 developers in implementing appropriate interventions to achieve the newborn health post-  
657 2015 Sustainable Development Goals of no more than 12 neonatal deaths per 1000 live births  
658 in Sao Tome & Principe by 2030 [74].

### 659 **Strengths and Limitations**

660 In this study, the researcher retrieved maternal and neonatal data directly from ANC cards  
661 and maternity registers to limit recall bias. The selection of the death-outcome group and  
662 alive-outcome group was based on the records of maternal and neonatal registers; therefore, it  
663 is less likely that this study has misclassification biases both in the exposure and death-  
664 outcome group □ alive-outcome group categories [75].

665 Regarding the limitations, this is a relatively small study aiming to identify factors associated  
666 with peri-neonatal mortality in Sao Tome & Principe with a cohort of 194 newborns that  
667 were followed up until 28th days of age, 22 died and 172 survived. Thus, this study results  
668 cannot be generalized.

669 The newborns lost to follow-up were mainly due to mothers who provided the wrong mobile  
670 number or who did not answer the phone call at a significantly high rate; hence, the real  
671 number of early and late neonatal deaths can be much higher than the rate we have found.

672 Current knowledge gaps, including those associated with local burden, bacterial etiology, and  
673 eventual difficulty of nurses and mothers in perceiving subtle clinical signs associated with  
674 neonatal infections prevented us from having a clear picture of the situation in this study [43].

675 Data on maternal weight gain during pregnancy, nutritional status, BMI, maternal intrapartum  
676 antibiotic prophylaxis, antenatal corticosteroid administration, and total time of labor were  
677 not available.

678 Another limitation is that some of the variables mentioned in the univariable model had wide  
679 confidence intervals and high odds ratios due to the low number of death-outcome group  
680 enrolled in this study. This was a barrier to conducting a multivariable model, a limitation  
681 also reported in other studies [37]. Due to the small number of neonatal death-outcome group  
682 enrolled and these wide confidence intervals, the multivariable logistic regression model  
683 could only identify one independent determinant of mortality outcome.

684 Nonetheless, the current study can assist Sao Tome & Principe policy makers and  
685 stakeholders in designing new policies for the country to improve maternal and neonatal  
686 health outcomes.

687

688

## 689 **Conclusions**

---

690

691 Complications such as a high-risk pregnancy score, meconium-stained amniotic fluid,  
692 prolonged rupture of membranes, being transferred from another unit, and an instrumental-  
693 assisted vaginal delivery increased the risk of stillbirth and neonatal death between 4- and 9-  
694 fold, and 90% of all these deaths occurred in the perinatal period.

695 Newborns with an infectious risk, intrauterine growth restriction, fetal distress at birth, who  
696 needed resuscitation maneuvers, birth asphyxia, and those admitted to the neonatal unit had a  
697 3- to 55-fold higher risk for dying than the alive-outcome group. Female newborn and birth  
698 weight of more than 2500 g were found to be protective factors.

699 Implementing an efficient referral system that directs high-risk pregnancies to the EmOC  
700 facility, equipment (continuous fetal heart monitoring capability in all district maternity  
701 wards) and personnel technical skills will improve peri-neonatal outcomes and survival in  
702 Sao Tome & Principe.



703

704

705

706

707

708

709

710

711

712

713

714

715

716

717

718 **Declarations**

---

719

720 **Ethics approval and consent to participate**

721 The Ministry of Health of Sao Tome & Principe and the main board of the Hospital Dr. Ayres  
722 de Menezes are dedicated ethics oversight bodies, and both approved this study. At the time  
723 of the study protocol was submitted (year 2016), there were no ethics committees in STP. All  
724 methods were performed in accordance with the relevant guidelines and regulations in  
725 practice. Written informed consent was obtained from all participants (or their parent or legal  
726 guardian in the case of adolescent under 16 or for illiterate pregnant women) after the  
727 purpose of the research was explained orally by the principal investigator. Participants' or  
728 their legal representatives' also consented to have the results of this research work published.  
729 Participation in the survey was voluntary, as participants could decline to participate at any  
730 time during the study.

731

732 **Consent for publication**

733 Not applicable.

734

735 **Availability of data and materials**

736 The datasets used and/or analyzed during the current study are all available within the  
737 manuscript itself.

738

### 739 **Competing interests**

740 No.

741

### 742 **Funding**

743 AV was supported by the Fundação para a Ciência e Tecnologia (FCT)  
744 (<https://www.fct.pt/index.phtml.pt/>), grant number SFRH/BD/117037/2016. The funder had  
745 no role in study design, data collection and analysis, decision to publish or preparation of the  
746 manuscript.

747

748

### 749 **Abbreviations**

750 ANC – antenatal care; CI – confidence interval; cOR: crude odds ratio; GA – gestational age;  
751 HAM: Hospital Dr. Ayres de Menezes; IPI – intestinal parasitic infection; IUGR –  
752 intrauterine growth restriction; PROM – prolonged rupture of membranes; NCU – Neonatal  
753 Care Unit

754

### 755 **Authors' contributions**

756 AV, MCM and FP carried out the conception and design of the study. AV was responsible for  
757 field activities, data collection, and wrote the manuscript. MCM and FP critically evaluated  
758 and made progressive suggestions throughout the study and revised the manuscript. MA and  
759 ALP performed statistical analysis and reviewed the manuscript. SS and NB were involved in  
760 the study design at the country level. All the authors read and approved the final draft of the  
761 manuscript.

762

### 763 **Acknowledgments**

764 A special remark for the late Professor João Luís Baptista MD PhD - AV research  
765 cosupervisor - a great man who was a thinker and a fighter for Africa's improvement of  
766 public health. We are indebted to all the women who participated in the study. The authors  
767 would like to thank Elizabeth Carvalho and the 1) medical team and nurses of Hospital Dr.  
768 Ayres de Menezes Maternity unit for their support, especially to the chief-nurse Paulina  
769 Oliveira; and 2) Ana Sequeira, Rita Coelho, Ana Margalha, Ana Castro, Alexandra Coelho,

770 and Inês Gomes for field support. We would like to acknowledge Instituto Camões, I.P. for  
771 logistic assistance in STP.

772

773 **Authors' Information**

774 AV is a Portuguese pediatrician with 14 years of short- and long- missions in Sao Tome &  
775 Principe, with a postgraduation in Tropical Medicine from the London Hospital of Tropical  
776 Medicine through the first East-African Course in Uganda and Tanzania and is about to finish  
777 her PhD thesis on neonatal mortality and morbidity in STP.

778

779 **References**

- 780 1. Getiye Y, Fantahun M. Factors associated with perinatal mortality among public health  
781 deliveries in Addis Ababa, Ethiopia, an unmatched case control study. *BMC pregnancy and*  
782 *childbirth*. 2017;17(1):1-7.
- 783 2. Pathirana J, Muñoz FM, Abbing-Karahagopian V, Bhat N, Harris T, Kapoor A, Keene DL,  
784 Mangili A, Padula MA, Pande SL, Pool V. Neonatal death: Case definition & guidelines for  
785 data collection, analysis, and presentation of immunization safety data. *Vaccine*.  
786 2016;34(49):6027-37.
- 787 3. WHO. Every new born: an action plan to end preventable deaths. February 2014. Available  
788 at: [https://cdn.who.int/media/docs/default-source/mca-documents/advisory-groups/quality-of-](https://cdn.who.int/media/docs/default-source/mca-documents/advisory-groups/quality-of-care/every-new-born-action-plan-(enap).pdf?sfvrsn=4d7b389_2)  
789 [care/every-new-born-action-plan-\(enap\).pdf?sfvrsn=4d7b389\\_2](https://cdn.who.int/media/docs/default-source/mca-documents/advisory-groups/quality-of-care/every-new-born-action-plan-(enap).pdf?sfvrsn=4d7b389_2)
- 790 4. Lehtonen L, Gimeno A, Parra-Llorca A, Vento M. Early neonatal death: A challenge  
791 worldwide. *Semin Fetal Neonatal Med*. 2017;22(3):153-160. doi: 10.1016/j.siny.2017.02.006.  
792 Epub 2017 Feb 24. PMID: 28238633.
- 793 5. Hug L, You D, Blencowe H, Mishra A, Wang Z, Fix MJ, Wakefield J, Moran AC, Gaigbe-  
794 Togbe V, Suzuki E, Blau DM. Global, regional, and national estimates and trends in  
795 stillbirths from 2000 to 2019: a systematic assessment. *The Lancet*. 2021 Aug  
796 28;398(10302):772-85. [https://doi.org/10.1016/S0140-6736\(21\)01112-0](https://doi.org/10.1016/S0140-6736(21)01112-0)
- 797 6. Dagne HM, Melku AT, Abdi AA. Determinants of stillbirth among deliveries attended in  
798 Bale Zone Hospitals, Oromia Regional State, Southeast Ethiopia: a case-control study.  
799 *International Journal of Women's Health*. 2021;13:51.
- 800 7. Lawn JE, Kerber K, Enweronu-Laryea C, Masee Bateman O. Newborn survival in low  
801 resource settings—are we delivering?. *BJOG: An International Journal of Obstetrics &*  
802 *Gynaecology*. 2009;116:49-59.
- 803 8. Lawn JE, Cousens S, Zupan J, Lancet Neonatal Survival Steering Team. 4 million neonatal  
804 deaths: when? Where? Why?. *The lancet*. 2005 Mar 5;365(9462):891-900.
- 805 9. Lawn JE, Blencowe H, Pattinson R, Cousens S, Kumar R, Ibiebele I, et al. Stillbirths:  
806 Where? When? Why? How to make the data count? *Lancet*. 2011;377(9775):1448–63.
- 807 10. Blencowe H, Cousens S. Addressing the challenge of neonatal mortality. *Tropical*  
808 *Medicine & International Health*. 2013;18(3):303-12.
- 809 11. Lavin T, Allanson ER, Nedkoff L, Preen DB, Pattinson RC. Applying the international  
810 classification of diseases to perinatal mortality data, South Africa. *Bulletin of the World*  
811 *Health Organization*. 2018 Dec 1;96(12):806.

- 812 12. Obad MA, Taher R, Qayad M, Khader YS. Risk factors of stillbirth in Yemen. *J Neonatal*  
813 *Perinatal Med.* 2018;11(2):131–136. doi:10.3233/ NPM-18174618.
- 814 13. Adane, et al. Adverse birth outcomes among deliveries in Gonder university hospital,  
815 Northwest Ethiopia. *BMC Pregnancy Childbirth.* 2014;14:90  
816 <http://www.biomedcentral.com/1471-2393/14/90>
- 817 14. Chi BH, Wang L, Read JS, Taha TE, Sinkala M, Brown ER, Valentine M, Martinson F,  
818 Goldenberg RL: Predictors of stillbirth in sub-saharan Africa. *Obstet Gynecol.* 2007, 110 (5):  
819 989-997. 10.1097/01.AOG.0000281667.35113.a5.
- 820 15. Stringer EM, Vwalika B, Killam WP, Giganti MJ, Mbewe R, Chi BH, Chintu N, Rouse  
821 D, Goldenberg RL, Stringer JS: Determinants of stillbirth in Zambia. *Obstet Gynecol.* 2011,  
822 117 (5): 1151-1159. 10.1097/AOG.0b013e3182167627.
- 823 16. Sao Tome and Principe WHO statistical profile. WHO Libr. 2015. [https://www.who.int/](https://www.who.int/gho/countries/stp.pdf)  
824 [gho/countries/stp.pdf](https://www.who.int/gho/countries/stp.pdf).
- 825 17. INE e UNICEF. 2020. Inquérito de Indicadores Múltiplos 2019, Relatório final. São  
826 Tomé, São Tomé e Príncipe: Instituto Nacional de Estatística e Fundo das Nações Unidas  
827 para a Infância. Available at: [https://mics-surveys-](https://mics-surveys-prod.s3.amazonaws.com/MICS6/West%20and%20Central%20Africa/Sao%20Tome%20and%20Principe/2019/Survey%20findings/Sao%20Tome%20e%20Principe%202019%20MICS%20Survey%20Findings%20Report_Portuguese.pdf)  
828 [prod.s3.amazonaws.com/MICS6/West%20and%20Central%20Africa/Sao%20Tome%20and](https://mics-surveys-prod.s3.amazonaws.com/MICS6/West%20and%20Central%20Africa/Sao%20Tome%20and%20Principe/2019/Survey%20findings/Sao%20Tome%20e%20Principe%202019%20MICS%20Survey%20Findings%20Report_Portuguese.pdf)  
829 [%20Principe/2019/Survey%20findings/Sao%20Tome%20e%20Principe%202019%20MICS](https://mics-surveys-prod.s3.amazonaws.com/MICS6/West%20and%20Central%20Africa/Sao%20Tome%20and%20Principe/2019/Survey%20findings/Sao%20Tome%20e%20Principe%202019%20MICS%20Survey%20Findings%20Report_Portuguese.pdf)  
830 [%20Survey%20Findings%20Report\\_Portuguese.pdf](https://mics-surveys-prod.s3.amazonaws.com/MICS6/West%20and%20Central%20Africa/Sao%20Tome%20and%20Principe/2019/Survey%20findings/Sao%20Tome%20e%20Principe%202019%20MICS%20Survey%20Findings%20Report_Portuguese.pdf)
- 831 18. UNICEF IN de E (INE) e. Inquérito de Indicadores Múltiplos, São Tome e Principe,  
832 MICS-STP, 2014, Principais resultados. SaoTome, SaoTome e Principe, INE e UNICEF.  
833 2015; Instituto Nacional de Estatística, 2016. Inquérito aos Indicadores Múltiplos 2014 de  
834 São Tomé e Príncipe, Relatório Final. São Tomé, São Tomé e Príncipe.  
835 [http:// ms. gov. st/ wp- conte nt/ uploads/ 2019/ 01/ MICS- Final- Report- STP\\_ Portu gu%](http://ms.gov.st/wp-content/uploads/2019/01/MICS-Final-Report-STP_Portugu%C3%AAs.Pdf)  
836 [C3% AAs. Pdf](http://ms.gov.st/wp-content/uploads/2019/01/MICS-Final-Report-STP_Portugu%C3%AAs.Pdf)
- 837 19. Bhutta Z, Das JK, Bahl R, Lawn JE, Salam R, Paul VK, et al. Can available interventions  
838 end preventable deaths in mothers, newborn babies, and stillbirths, and at what cost? *Lancet.*  
839 2014;384(9940):347–70.
- 840 20. Beyond2015, Gcap, Ifp. Civil Society Demands for the Post-2015 Agenda from 39  
841 Countries. 2013;
- 842 21. Dickson KE, Simen-Kapeu A, Kinney M V., Huicho L, Vesel L, Lackritz E, et al. Every  
843 Newborn: Health-systems bottlenecks and strategies to accelerate scale-up in countries.  
844 *Lancet.* 2014;384(9941):438–54.

- 845 22. Nair N, Tripathy P, Prost A, Costello A, Osrin D. Improving newborn survival in low-  
846 income countries: Community-based approaches and lessons from South Asia. *PLoS Med.*  
847 2010;7(4).
- 848 23. Vasconcelos A, Bandeira N, Sousa S, Pereira F, Machado MD. Adolescent pregnancy in  
849 Sao Tome and Principe: a cross-sectional hospital-based study. *BMC Pregnancy and*  
850 *Childbirth.* 2022 Dec;22(1):1-5.
- 851 24. Vasconcelos A, Bandeira N, Sousa S, Machado MC, Pereira F. Adolescent pregnancy in  
852 Sao Tome and Principe: are there different obstetric and perinatal outcomes?. *BMC*  
853 *Pregnancy and Childbirth.* 2022 Dec;22(1):1-1.
- 854 25. Vasconcelos A, Sousa S, Bandeira N, Baptista JL, Machado MD, Pereira F. PO 8592  
855 Why, when and where do newborns not only get sick but also die in são tomé and príncipe?  
856 A case-control study.
- 857 26. Ministério da Saúde\_ República Democrática de Sao Tome e Principe\_Plano Nacional do  
858 Desenvolvimento da Saúde 2017-2021
- 859 27. Tavares Da Silva F, Gonik B, McMillan M, Keech C, Dellicour S, Bhange S, Tila M,  
860 Harper DM, Woods C, Kawai AT, Kochhar S, Munoz FM; Brighton Collaboration Stillbirth  
861 Working Group. Stillbirth: Case definition and guidelines for data collection, analysis, and  
862 presentation of maternal immunization safety data. *Vaccine.* 2016;34(49):6057-6068. doi:  
863 10.1016/j.vaccine.2016.03.044. Epub 2016 Jul 16. PMID: 27431422; PMCID: PMC5139804.
- 864 28. Kikuchi K, Ansah EK, Okawa S, Enuameh Y, Yasuoka J, Nanishi K, et al. Effective  
865 linkages of continuum of care for improving neonatal, perinatal, and maternal mortality: a  
866 systematic review and metaanalysis. *PloS one.* 2015; 10(9):e0139288. doi:  
867 10.1371/journal.pone.0139288 PMID: 26422685
- 868 29. Mulwooza J, Santos N, Isabirye N et al. Midwife-performed checklist and ultrasound to  
869 identify obstetric conditions at labour triage in Uganda: A quasi-experimental study.  
870 *Midwifery.* 2021;96:102949.
- 871 30. Weissmann-Brenner A, Meyer R, Domniz N, Levin G, Hendin N, Yoeli-Ullman R,  
872 Mazaki-Tovi S, Weissbach T, Kassif E. The perils of true knot of the umbilical cord:  
873 Antepartum, intrapartum and postpartum complications and clinical implications. *Archives of*  
874 *Gynecology and Obstetrics.* 2022;305(3):573-9.
- 875 31. Chiabi A, Takou V, Mah E, Nguéfack S, Siyou H, Takou V, et al. Risk factors for  
876 neonatal mortality at the Yaounde Gynaeco-Obstetric and Pediatric Hospital. Cameroon.  
877 *Iranian Journal of Pediatrics.* 2014;24(4):393–400.

- 878 32. Tewabe T, Mohammed S, Tilahun Y et al. Clinical outcome and risk factors of neonatal  
879 sepsis among neonates in Felege Hiwot referral Hospital, Bahir Dar, Amhara Regional State,  
880 North West Ethiopia 2016: a retrospective chart review. *BMC Res Notes*. 2017;10, 265.  
881 <https://doi.org/10.1186/s13104-017-2573-1>
- 882 33. Avagliano L, Massa V, Bulfamante G. Meconium-stained amniotic fluid and histologic  
883 signs of fetal distress in stillbirths. *European Journal of Obstetrics & Gynecology and*  
884 *Reproductive Biology*. 2021;266:55-62.
- 885 34. Shaikh S, Shaikh AH, Shaikh SA, Isran B. Frequency of obstructed labor in teenage  
886 pregnancy. *Nepal Journal of Obstetrics and Gynaecology*. 2012;7(1):37-40.
- 887 35. Alemu AY, Belay GM, Berhanu M, Minuye B. Determinants of neonatal mortality at  
888 neonatal intensive care unit in Northeast Ethiopia: unmatched case-control study. *Tropical*  
889 *Medicine and Health*. 2020 Dec;48(1):1-0.
- 890 36. Yego F, D'Este C, Byles J, Nyongesa P, Williams JS. A case-control study of risk factors  
891 for fetal and early neonatal deaths in a tertiary hospital in Kenya. *BMC pregnancy and*  
892 *childbirth*. 2014 Dec;14(1):1-9.
- 893 37. Demisse AG, Alemu F, Gizaw MA, Tigabu Z. Patterns of admission and factors  
894 associated with neonatal mortality among neonates admitted to the neonatal intensive care  
895 unit of University of Gondar Hospital, Northwest Ethiopia. *Pediatric health, medicine and*  
896 *therapeutics*. 2017;8:57.
- 897 38. Abadiga M, Mosisa G, Tsegaye R, et al. Determinants of adverse birth outcomes among  
898 women delivered in public hospitals of Ethiopia, 2020. *Archives of Public Health*.  
899 2022;80(1):1-7. <https://doi.org/10.1186/s13690-021-00776-0>
- 900 39. Pimentel J, Ansari U, Omer K, et al. Factors associated with short birth interval in low-  
901 and middle-income countries: a systematic review. *BMC Pregnancy Childbirth* 2020;20,156.  
902 <https://doi.org/10.1186/s12884-020-2852-z>
- 903 40. Esoh K, Wonkam-Tingang E, Wonkam A. Sickle cell disease in sub-Saharan Africa:  
904 transferable strategies for prevention and care. *The Lancet Haematology*. 2021
- 905 41. Cutland CL, Lackritz EM, Mallett-Moore T, Bardají A, Chandrasekaran R, Lahariya C,  
906 Nisar MI, Tapia MD, Pathirana J, Kochhar S, Muñoz FM. Low birth weight: Case definition  
907 & guidelines for data collection, analysis, and presentation of maternal immunization safety  
908 data. *Vaccine*. 2017;35(48Part A):6492.
- 909 42. Accrombessi M, Zeitlin J, Massougbojji A, Cot M, Briand V. What do we know about  
910 risk factors for fetal growth restriction in Africa at the time of sustainable development goals?  
911 A scoping review. *Paediatric and perinatal epidemiology*. 2018;32(2):184-96.

- 912 43. Huynh B, Kermorvant-Duchemin E, Herindrainy P et al. Bacterial Infections in Neonates,  
913 Madagascar, 2012–2014. *Emerging Infectious Diseases*. 2018; 24(4), 710-717.  
914 <https://doi.org/10.3201/eid2404.161977>
- 915 44. Wosenu L, Worku AG, Teshome DF, Gelagay AA. Determinants of birth asphyxia  
916 among live birth newborns in University of Gondar referral hospital, northwest Ethiopia: A  
917 case-control study. *PLoS ONE*. 2018;13(9): e0203763.
- 918 45. Mbachu, I, Achigbu, K, Odinaka, K, et al. Tracking stillbirths by referral pattern and  
919 causes in a rural tertiary hospital in Southern Nigeria. *Niger Postgrad Med J* 2018; 25(2): 87–  
920 93.
- 921 46. Chuwa, FS, Mwanamsangu, AH, Brown, BG, et al. Maternal and fetal risk factors for  
922 stillbirth in Northern Tanzania: a registry-based retrospective cohort study. *PLoS ONE* 2017;  
923 12(8): e0182250.
- 924 47. Mulatu T, Debella A, Feto T, Dessie Y. Determinants of stillbirth among women who  
925 gave birth at Hiwot Fana Specialized University Hospital, Eastern Ethiopia: A facility-based  
926 cross-sectional study. *SAGE Open Medicine*. 2022 Feb;10:20503121221076370.
- 927 48. Chaibva, et al. Adverse pregnancy outcomes, ‘stillbirths and early neonatal deaths’ in  
928 Mutare district, Zimbabwe. *BMC Pregnancy Childbirth*. 2019;19:86.  
929 <https://doi.org/10.1186/s12884-019-2229-3>
- 930 49. Lawn JE, Blencowe H, Waiswa P, et al, for The Lancet Ending Preventable Stillbirths  
931 Series study group with The Lancet Stillbirth Epidemiology investigator group. Stillbirths:  
932 rates, risk factors, and acceleration towards 2030. *Lancet* 2016;  
933 [https://doi.org/10.1016/S0140-6736\(15\)00837-5](https://doi.org/10.1016/S0140-6736(15)00837-5)
- 934 50. Mamo SA, Teshome GS, Tesfaye T, Goshu AT. Perinatal asphyxia and associated factors  
935 among neonates admitted to a specialized public hospital in South Central Ethiopia: A  
936 retrospective cross-sectional study. *PloS one*. 2022;17(1):e0262619.
- 937 51. Desai D, Maitra N, Patel P. Fetal heart rate patterns in patients with thick meconium  
938 staining of amniotic fluid and its association with perinatal outcome. *Int J Reprod Contracept*  
939 *Obstet Gynecol*. 2017;6(3):1030–5
- 940 52. Asiki, et al. Adverse pregnancy outcomes in rural Uganda (1996–2013): trends and  
941 associated factors from serial cross-sectional surveys. *BMC Pregnancy Childbirth*.  
942 2015;15:279. <https://doi.org/10.1186/s12884-015-0708-8>
- 943 53. Lawn J, Shibuya K, Stein C. No cry at birth: global estimates of intrapartum stillbirths  
944 and intrapartum-related neonatal deaths. *Bull World Health Organ*. 2005;83:409–17



- 945 54. Assefa, N., Berhe, H., Girma, F. et al. Risk factors of premature rupture of membranes in  
946 public hospitals at Mekele city, Tigray, a case control study. *BMC Pregnancy Childbirth*.  
947 2018; 18, 386 <https://doi.org/10.1186/s12884-018-2016-6>
- 948 55. Alam MM, Saleem AF, Shaikh AS, Munir O, Qadir M. Neonatal sepsis following  
949 prolonged rupture of membranes in a tertiary care hospital in Karachi, Pakistan. *The Journal*  
950 *of Infection in Developing Countries*. 2014;8(01):067-73.
- 951 56. Geleto, A., Chojenta, C., Musa, A. et al. Barriers to access and utilization of emergency  
952 obstetric care at health facilities in sub-Saharan Africa: a systematic review of literature. *Syst*  
953 *Rev*. 2018; 7, 183. <https://doi.org/10.1186/s13643-018-0842-2>
- 954 57. Habte A, Wondimu M. Determinants of maternal near miss among women admitted to  
955 maternity wards of tertiary hospitals in Southern Ethiopia, 2020: A hospital-based case-  
956 control study. *PloS one*, 2021. 16(5): p. e0251826.  
957 <https://doi.org/10.1371/journal.pone.0251826>
- 958 58. Thakur N, Sunny AK, Gurung R, Basnet O, Litorp H, Ashish KC. Rate and Neonatal  
959 Outcomes Among Instrument Assisted Vaginal Birth in 12 Public Hospitals in Nepal.  
960 Preprint. DOI: <https://doi.org/10.21203/rs.3.rs-36775/v1>
- 961 59. Hailemichael HT, Debelew GT, Alema HB, Weldu MG, Misgina KH. Determinants of  
962 adverse birth outcome in Tigray region, North Ethiopia: Hospital-based case-control study.  
963 *BMC pediatrics*. 2020;20(1):1-9. <https://doi.org/10.1186/s12887-019-1835-6>
- 964 60. Mondal D, Galloway TS, Bailey TC, Mathews F. Elevated risk of stillbirth in males:  
965 systematic review and meta-analysis of more than 30 million births. *BMC medicine*.  
966 2014;12(1):1-1.
- 967 61. Aghai ZH, Goudar SS, Patel A, Saleem S, Dhaded SM, Kavi A, Lalakia P, Naqvi F,  
968 Hibberd PL, McClure EM, Nolen TL. Gender variations in neonatal and early infant  
969 mortality in India and Pakistan: a secondary analysis from the Global Network Maternal  
970 Newborn Health Registry. *Reproductive Health*. 2020;17(3):1-1.  
971 <https://doi.org/10.1186/s12978-020-01028-0>
- 972 62. Pongou R. Why is infant mortality higher in boys than in girls? A new hypothesis based  
973 on preconception environment and evidence from a large sample of twins. *Demography*.  
974 2013;50(2):421-44.
- 975 63. KC A, Basel PL, Singh S. Low birth weight and its associated risk factors: Health  
976 facility-based case-control study. *PloS one*. 2020;15(6):e0234907.

977 64. Yadeta TA, Worku A, Egata G, Seyoum B, Marami D, Berhane Y. Vertical transmission  
978 of group B Streptococcus and associated factors among pregnant women: a cross-sectional  
979 study, Eastern Ethiopia. *Infection and drug resistance*. 2018;11:397.

980 65. El T, Gombe N, Shambira G, Chadambuka A, Mufuta T, Zizhou S. Determinants of  
981 perinatal mortality in Marondera district, Mashonal and East Province of Zimbabwe.2009.  
982 *Pan Afr Med J*. 2011;8(7).

983 66. Goldenberg RL, Harrison MS, McClure EM. Stillbirths: the hidden birth asphyxia—US  
984 and Global perspectives. *Clinics in perinatology*. 2016;43(3):439-53.

985 67. Gutman A, Harty T, O'Donoghue K, Greene R, Leitao S. Perinatal mortality audits and  
986 reporting of perinatal deaths: systematic review of outcomes and barriers. *Journal of Perinatal  
987 Medicine*. 2022;26. <https://doi.org/10.1515/jpm-2021-0363>

988 68. Berhan Y, Berhan A. Perinatal mortality trends in Ethiopia. *Ethiopian journal of health  
989 sciences*. 2014;24:29-40.

990 69. Chiabi A, Takou V, Mah E, Nguetack S, Siyou H, Takou V, et al. Risk factors for  
991 neonatal mortality at the Yaounde Gynaeco-Obstetric and Pediatric Hospital. Cameroon.  
992 *Iranian Journal of Pediatrics*. 2014;24(4):393–400.

993 70. American College of Obstetricians and Gynecologists. The Apgar score (Committee  
994 Opinion No. 644). *Obstet Gynecol*. 2015;126(4):52–5.

995 71. Habte A, Lukas K, Melis T, Tamene A, Sahle T, Hailu M, et al. (2022) Determinants of  
996 neonatal near miss among neonates admitted to public hospitals in Southern Ethiopia, 2021:  
997 A case-control study. *PLoS ONE* 17(5): e0268041.  
998 <https://doi.org/10.1371/journal.pone.0268041>

999 72. Hug L, You D, Blencowe H, Mishra A, Wang Z, Fix MJ, Wakefield J, Moran AC,  
1000 Gaigbe-Togbe V, Suzuki E, Blau DM. Global, regional, and national estimates and trends in  
1001 stillbirths from 2000 to 2019: a systematic assessment. *The Lancet*. 2021 Aug  
1002 28;398(10302):772-85. [https://doi.org/10.1016/S0140-6736\(21\)01112-0](https://doi.org/10.1016/S0140-6736(21)01112-0)

1003 73. Ota, E, da Silva Lopes, K, Middleton, P, Flenady, V, Wariki, WM, Rahman, MO, et al..  
1004 Antenatal interventions for preventing stillbirth, fetal loss and perinatal death: an overview of  
1005 Cochrane systematic reviews. *Cochrane Database Syst Rev* 2020;12:CD009599.  
1006 <https://doi.org/10.1002/14651858.CD009599.pub2>.

1007 74. Paulson KR, Kamath AM, Alam T, Bienhoff K, Abady GG, Abbas J, Abbasi-Kangevari  
1008 M, Abbastabar H, Abd-Allah F, Abd-Elsalam SM, Abdoli A. Global, regional, and national  
1009 progress towards Sustainable Development Goal 3.2 for neonatal and child health: all-cause

1010 and cause-specific mortality findings from the Global Burden of Disease Study 2019. The  
1011 Lancet. 2021;398(10303):870-905. [https://doi.org/10.1016/S0140-6736\(21\)01207-1](https://doi.org/10.1016/S0140-6736(21)01207-1)  
1012 75. KC A, Basel PL, Singh S. Low birth weight and its associated risk factors: Health  
1013 facility-based case-control study. PloS one. 2020;15(6):e0234907.  
1014 <https://doi.org/10.1371/journal.pone.0234907>

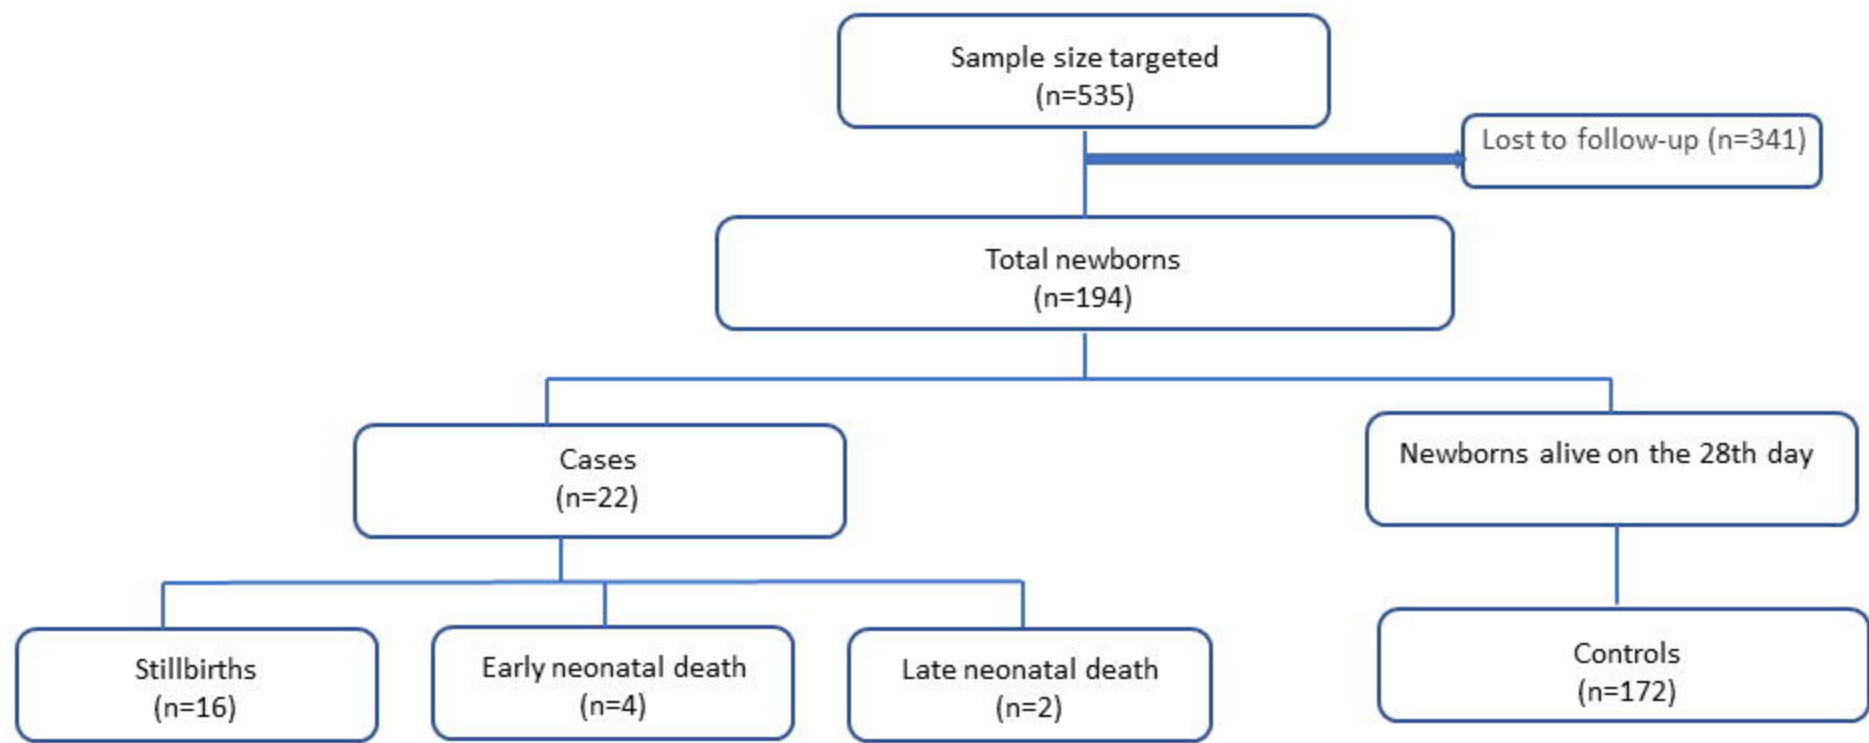

Source: https://medrxiv.org/content/medrxiv/early/2023/04/03/2022.08.07.22278476.full.pdf
